# Supplementary material for: Anthelmintic niclosamide suppresses transcription of BCR-ABL fusion oncogene via disabling Sp1 and induces apoptosis in imatinib-resistant CML cells harboring T315I mutant
Source: PubMed Central journal article supplement (PMC5833368; doi:10.1038/s41419-017-0075-7), 2018-01-22
Supplement: 41419_2017_75_MOESM2_ESM.pdf [file 41419_2017_75_MOESM2_ESM.pdf]

## Supplementary Figure S2

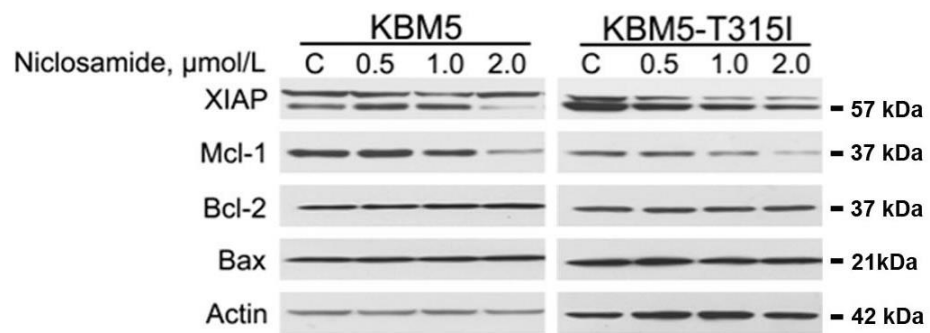

### Supplementary Figure S2. Niclosamide decreased the level of Mcl-1 and XIAP.

Niclosamide decreased the level of Mcl-1 and XIAP in a dose-dependent manner. KBM5 and KBM5-T315I cells with niclosamide treatment were subjected to Western blotting analysis.
